# Supplementary material for: Relative timing of precipitation and ocean circulation changes in the western equatorial Atlantic over the last 45 ky
Source: Copernicus journal article supplement (doi:10.5194/cp-2018-22), 2018-03-19
Supplement: Supplementary file 1 [file Tab.S1&S2.xlsx]

## Sheet: Pa-Th
Waelbroeck et al., Climate of the Past
Table S1. 231Pa, 230Th, 232Th, and 238U activities (dpm.g-1). Pa/Th values are computed with a detrital U/Th ratio of 0.5±0.05
Core	Depth, cm	Age, ka	1 σ	231Pa	2 σ	230Th	2 σ	232Th	2 σ	238U	2 σ	231Pa_xs	230Th_xs	231Pa_xs_0	230Th_xs_0	Preserved vertical flux (g/m2/y)	232Th flux (dpm/cm2/ky)	Pa/Th	2 σ	Reference
MD09-3257	0	0.276	0.123	0.175949	0.00110293	2.98194	0.165038	1.07664	0.0185287	1.32682	0.0345272	0.151	2.4413	0.1518	2.4475	25.5705	2.75302	0.0620456	0.00862533	Burckel et al., 2015
MD09-3257	10	1.85725	1.09669	0.218761	0.00264651	3.49026	0.209654	1.09784	0.0180702	1.3903	0.0177201	0.192	2.925	0.1997	2.9754	21.0341	2.30921	0.0671215	0.0100468	Burckel et al., 2015
MD09-3257	80	10.681	0.114	0.207271	0.00427605	3.76248	0.067445	2.36605	0.0331326	2.1088	0.149274	0.1442	2.4804	0.1807	2.7363	22.8719	5.41159	0.0660725	0.00562884	this study
MD09-3257	84	10.9038	0.279125	0.206803	0.00324617	3.65353	0.0696847	2.57727	0.0342265	2.10823	0.0462343	0.1397	2.2754	0.176	2.5154	24.8808	6.41245	0.0699724	0.00590887	this study
MD09-3257	92	11.3495	0.389871	0.166514	0.00148771	2.94753	0.00997906	2.80281	0.00404084	2.41621	0.012605	0.092	1.4311	0.117	1.5885	39.3995	11.0429	0.0736915	0.00624619	this study
MD09-3257	100	11.7951	0.395066	0.208436	0.00204188	3.42638	0.00458236	3.10906	0.00404084	2.51276	0.0135293	0.1271	1.7592	0.1632	1.9607	31.9198	9.92405	0.0832479	0.00728777	this study
MD09-3257	108	12.2407	0.307101	0.190705	0.0033749	3.03905	0.0547382	2.84394	0.0370545	2.04326	0.0397165	0.1187	1.5414	0.1538	1.7251	36.28	10.3178	0.0891962	0.0109371	this study
MD09-3257	114	12.9756	0.608139	0.244663	0.00426988	4.0082	0.0541312	2.55666	0.0226698	2.15009	0.146697	0.1762	2.6177	0.2318	2.9494	21.2193	5.42504	0.0786206	0.00573895	this study
MD09-3257	114	12.9756	0.608139	0.241158	0.00375538	3.99063	0.0746289	2.5399	0.0356738	2.16385	0.0427214	0.1728	2.6057	0.2274	2.9359	21.3173	5.41439	0.077476	0.00620487	this study
MD09-3257	118	13.5254	0.631256	0.188239	0.00196102	3.50471	0.0114434	2.08891	0.00404084	2.09232	0.0104158	0.1281	2.3201	0.1706	2.6273	23.8205	4.9759	0.0649515	0.00313202	this study
MD09-3257	120	13.8004	0.591782	0.189499	0.00328318	3.55345	0.0555677	2.112	0.0222649	2.17188	0.0527047	0.1279	2.3453	0.1712	2.6627	23.5045	4.96416	0.0643256	0.00471245	this study
MD09-3257	124	14.3324	0.368447	0.204396	0.00135442	3.76466	0.00474758	2.65647	0.00404084	1.92536	0.0100847	0.1361	2.3521	0.1843	2.6834	23.3227	6.19561	0.0686863	0.00338421	this study
MD09-3257	124	14.3324	0.368447	0.202218	0.00209353	3.79569	0.011723	2.72297	0.00404084	1.93874	0.017282	0.1326	2.3527	0.1796	2.6841	23.3168	6.34911	0.0669194	0.00364595	this study
MD09-3257	126	14.4887	0.408417	0.222269	0.00373721	3.72296	0.0599651	3.03043	0.0264488	1.92833	0.0411758	0.1475	2.1488	0.2004	2.455	25.4924	7.72531	0.0816574	0.00755311	this study
MD09-3257	132	14.9574	0.43156	0.248817	0.00385218	3.84141	0.0639375	3.32492	0.0424477	1.89285	0.0443778	0.1694	2.1451	0.2325	2.4614	25.4267	8.45419	0.0944793	0.00961591	this study
MD09-3257	140	15.5621	0.291282	0.25935	0.00440654	3.80305	0.0749174	3.80675	0.0455945	2.93141	0.0763963	0.1584	1.743	0.2202	2.0111	31.1198	11.8465	0.109543	0.0168583	this study
MD09-3257	168	17.2912	0.530713	0.193384	0.00301478	3.26344	0.0863424	4.20393	0.073936	2.78134	0.0620947	0.087	1.0473	0.1255	1.2278	50.9725	21.4284	0.102273	0.0315995	this study
MD09-3257	176	17.8185	0.49712	0.206519	0.00143759	3.72744	0.00552665	4.4315	0.00404084	2.74465	0.0125354	0.0969	1.4203	0.1412	1.6732	37.4041	16.5756	0.084466	0.0117391	this study
MD09-3257	178	17.9504	0.474528	0.217384	0.00450138	3.54371	0.063007	4.28012	0.073543	2.36454	0.0383428	0.1156	1.3646	0.169	1.6095	38.8845	16.643	0.105069	0.0219323	this study
MD09-3257	182	18.214	0.407748	0.264971	0.00650537	3.70649	0.0663171	4.08007	0.070368	2.44621	0.0397452	0.1651	1.5949	0.2427	1.8857	33.1899	13.5417	0.128751	0.0241321	this study
MD09-3257	184	18.3458	0.361382	0.312706	0.00469781	3.9545	0.0807629	3.61164	0.0458883	2.3028	0.0497117	0.2222	2.0605	0.3276	2.4391	25.6585	9.26693	0.13434	0.0178868	this study
MD09-3257	184	18.3458	0.361382	0.321279	0.00602538	3.98392	0.0699835	3.64727	0.0625354	2.26479	0.0370549	0.2308	2.082	0.3403	2.4646	25.3934	9.26165	0.138085	0.0182173	this study
MD09-3257	186	18.4777	0.291536	0.224519	0.00259284	4.02776	0.00678996	2.56263	0.00404084	1.93151	0.00994513	0.1558	2.6303	0.2304	3.1175	20.0756	5.14462	0.0739249	0.00398856	this study
MD09-3257	188	18.7066	0.487882	0.222824	0.00473755	3.86649	0.0689462	2.33938	0.0239945	1.76847	0.0403912	0.16	2.5887	0.2376	3.0745	20.3558	4.762	0.0773097	0.00658534	this study
MD09-3257	188	18.7066	0.487882	0.2207	0.00367214	3.80597	0.0708217	2.30897	0.0339269	1.75115	0.0433155	0.1586	2.5437	0.2356	3.0212	20.7155	4.78314	0.0779905	0.00617763	this study
MD09-3257	192	19.3232	0.813066	0.231144	0.00485892	3.69911	0.0737926	2.33914	0.0318473	1.36747	0.0365506	0.1742	2.4927	0.2623	2.9774	21.0198	4.91683	0.0880995	0.00791503	this study
MD09-3257	196	19.9398	0.976934	0.223533	0.00360076	3.91912	0.0777243	2.38129	0.0308851	1.38309	0.0279474	0.1657	2.6916	0.2526	3.2333	19.3564	4.60933	0.0781505	0.00608339	this study
MD09-3257	200	20.5564	1.04973	0.222052	0.00150129	3.90062	0.240724	2.23741	0.0583801	1.32601	0.0116814	0.1672	2.7411	0.2583	3.3115	18.8995	4.22858	0.0780127	0.014504	Burckel et al., 2015
MD09-3257	210	22.098	0.898796	0.153315	0.000591846	2.78517	0.15449	2.02176	0.0749155	1.54008	0.0462555	0.0977	1.6632	0.1559	2.0379	30.7106	6.20894	0.0765258	0.0152559	Burckel et al., 2015
MD09-3257	213	22.5605	0.738974	0.222644	0.000994563	3.77718	0.815186	2.28977	0.29408	1.46965	0.0228712	0.1643	2.5628	0.2648	3.1536	19.8453	4.54411	0.0839705	1.52016	Burckel et al., 2015
MD09-3257	215	22.8688	0.580441	0.206659	0.000835401	3.85605	0.33298	2.58006	0.122103	1.49027	0.0194577	0.1437	2.5227	0.2332	3.113	20.1042	5.18701	0.0749291	0.0218049	Burckel et al., 2015
MD09-3257	218	23.1963	0.34896	0.191368	0.000617794	3.75631	0.29654	2.62047	0.0902573	1.61687	0.0198023	0.1256	2.3788	0.2051	2.9444	21.2557	5.56999	0.0696957	0.0188617	Burckel et al., 2015
MD09-3257	220	23.3247	0.34556	0.178488	0.000833958	3.62837	0.330961	2.72388	0.176383	1.68257	0.0666828	0.11	2.1958	0.1802	2.721	23.0006	6.26508	0.0662718	0.0226076	Burckel et al., 2015
MD09-3257	220	23.3247	0.34556	0.184329	0.000490109	3.61217	0.183905	2.75537	0.0736521	1.6782	0.0761829	0.1155	2.1683	0.1892	2.6869	23.2925	6.41795	0.0704519	0.0126748	Burckel et al., 2015
MD09-3257	225	23.6456	0.29155	0.169352	0.000555279	3.27851	0.174702	3.12683	0.11408	1.67522	0.0265676	0.0953	1.6902	0.1573	2.1006	29.7932	9.31582	0.0749039	0.017092	Burckel et al., 2015
MD09-3257	227	23.774	0.239	0.189576	0.000842984	3.54106	0.159877	3.42622	0.116285	1.90632	0.0304124	0.1072	1.7846	0.1773	2.2207	28.1826	9.65596	0.0798696	0.0160597	Burckel et al., 2015
MD09-3257
MD09-3257	245	25.554	0.261	0.293665	0.00177162	4.42735	0.298292	2.92176	0.112803	2.18734	0.0721213	0.2124	2.7929	0.3648	3.5326	17.7163	5.17628	0.103284	0.0239954	Burckel et al., 2015
MD09-3257	245	25.554	0.261	0.29552	0.00140925	4.42522	0.370537	2.95053	0.129355	2.18065	0.109406	0.214	2.7814	0.3675	3.5181	17.7895	5.24885	0.10449	0.0304416	Burckel et al., 2015
MD09-3257	247	26.1375	0.389598	0.251854	0.00107019	4.0236	0.265549	3.13132	0.13175	2.06111	0.0307878	0.1701	2.3372	0.2957	2.9721	21.0574	6.59375	0.0995171	0.0249818	Burckel et al., 2015
MD09-3257	250	26.6646	0.613578	0.224598	0.00126469	3.95287	0.295962	2.5103	0.0983039	1.6839	0.0514839	0.1583	2.5914	0.2783	3.3114	18.9	4.74446	0.0840639	0.0206388	Burckel et al., 2015
MD09-3257	250	26.6646	0.613578	0.21996	0.000928242	3.96016	0.30609	2.50065	0.0877784	1.68538	0.0238783	0.1538	2.6019	0.2703	3.3248	18.8234	4.70706	0.0813215	0.0206791	Burckel et al., 2015
MD09-3257	252	26.9903	0.683677	0.187045	0.000703732	3.6583	0.251685	2.14339	0.0690866	1.48246	0.0192505	0.1295	2.4836	0.2292	3.1832	19.661	4.21412	0.0720216	0.0153403	Burckel et al., 2015
MD09-3257	255	27.4787	0.697291	0.172866	0.000715967	3.38811	0.216964	2.37744	0.0800407	1.46925	0.0196515	0.1124	2.1279	0.2011	2.7396	22.8444	5.43111	0.0734363	0.0160202	Burckel et al., 2015
MD09-3257	257	27.8044	0.646867	0.161534	0.000488398	3.37716	0.297734	2.54062	0.119476	1.47547	0.0165906	0.0988	2.054	0.178	2.6524	23.5953	5.99467	0.0671476	0.02156	Burckel et al., 2015
MD09-3257	257	27.8044	0.646867	0.158946	0.000483055	3.36216	0.251961	2.54844	0.0781357	1.46719	0.0153091	0.0963	2.0383	0.1735	2.6321	23.7778	6.05964	0.0659437	0.0175442	Burckel et al., 2015
MD09-3257	260	28.2929	0.464143	0.180279	0.000619233	3.60266	0.375163	3.10876	0.185467	1.54548	0.0156406	0.1087	2.0483	0.1978	2.6569	23.5557	7.32291	0.074498	0.0343026	Burckel et al., 2015
MD09-3257	264	28.7288	0.542498	0.213932	0.00459838	3.46352	0.0724427	2.97616	0.0612482	1.57485	0.0256033	0.1436	1.9525	0.2637	2.5428	24.6129	7.32519	0.103755	0.0121797	this study
MD09-3257	268	29.1408	0.625565	0.163854	0.00188916	3.31739	0.0101921	2.68414	0.00404084	1.98251	0.00639784	0.0885	1.8036	0.1639	2.3579	26.5431	7.12452	0.0695669	0.00461401	this study
MD09-3257	270	29.3468	0.643313	0.207661	0.00305985	4.00474	0.00230039	3.06078	0.00404084	2.32604	0.0105827	0.1203	2.2598	0.2238	2.9597	21.1454	6.47216	0.0756324	0.00547347	this study
MD09-3257	270	29.3468	0.643313	0.209198	0.00174472	4.02179	0.00865729	3.09382	0.00404084	2.31619	0.0223028	0.1216	2.2674	0.2263	2.9697	21.0742	6.51999	0.0762166	0.00452065	this study
MD09-3257	272	29.5527	0.647958	0.208509	0.00263999	4.03227	0.00432252	3.52272	0.00404084	2.18699	0.0146304	0.1183	2.1554	0.2211	2.8284	22.1271	7.79475	0.0782086	0.00590108	this study
MD09-3257	274	29.7587	0.636455	0.201144	0.00270074	3.94759	0.00984874	3.92096	0.00404084	2.19132	0.0108301	0.1059	1.9241	0.1988	2.5297	24.7403	9.70056	0.0786434	0.00683353	this study
MD09-3257	276	29.9647	0.611772	0.1952	0.0020439	3.79973	0.00915434	4.23138	0.00404084	2.16991	0.00749967	0.0966	1.6692	0.1822	2.1986	28.4651	12.0447	0.082915	0.00783673	this study
MD09-3257	282	30.5827	0.42499	0.210735	0.00181446	3.88757	0.0036859	3.73293	0.00404084	2.58774	0.00991317	0.109	1.8195	0.2082	2.4104	25.9648	9.69249	0.0864047	0.00750002	this study
MD09-3257	283	30.6857	0.348886	0.207035	0.00163562	3.80227	0.00548816	3.61245	0.00404084	2.73417	0.0100072	0.1035	1.7359	0.1981	2.3018	27.1891	9.82191	0.0860905	0.00747747	this study
MD09-3257	286	31.0848	0.410645	0.186605	0.00199634	3.61261	0.0110383	2.69506	0.00404084	2.36266	0.0127839	0.102	1.9774	0.197	2.6316	23.7821	6.4094	0.0748789	0.0047879	this study
MD09-3257	288	31.353	0.386	0.197878	0.00278247	3.58912	0.00545322	2.39988	0.00404084	2.14835	0.00807012	0.1215	2.1184	0.2358	2.8262	22.1442	5.31433	0.0834525	0.00557985	this study
MD09-3257	292	31.767	0.588545	0.160044	0.00118961	3.21568	0.0112041	2.16171	0.00404084	1.72565	0.00927547	0.0958	1.9486	0.1875	2.6097	23.9817	5.18416	0.0718834	0.00351094	this study
MD09-3257	294	31.9739	0.64592	0.14047	0.00117296	3.0387	0.0143505	2.08118	0.00404084	1.52728	0.00597952	0.0815	1.8568	0.1604	2.4914	25.1201	5.22795	0.0644106	0.00248047	this study
MD09-3257	296	32.1809	0.687508	0.12903	0.00196937	2.84286	0.0076805	2.26324	0.00404084	1.48396	0.0124185	0.0689	1.6084	0.1362	2.1622	28.945	6.55095	0.0630115	0.00450686	this study
MD09-3257	298	32.3879	0.717922	0.14038	0.00123544	3.04668	0.00992278	2.30727	0.00404084	1.37707	0.00643379	0.0822	1.8275	0.163	2.4614	25.4265	5.86657	0.066273	0.00338179	this study
MD09-3257	300	32.5949	0.736804	0.157102	0.00129305	3.11964	0.00422001	2.56614	0.00404084	1.31682	0.0125636	0.0973	1.8266	0.1938	2.4649	25.39	6.51543	0.0786755	0.00425824	this study
MD09-3257	301	32.6983	0.742272	0.150997	0.00182669	3.14058	0.00658322	2.71857	0.00404084	1.31991	0.0059118	0.0884	1.7813	0.1766	2.4061	26.011	7.07128	0.0734413	0.0043365	this study
MD09-3257	302	32.8018	0.744935	0.150606	0.00149705	3.15204	0.00729507	2.77891	0.00404084	1.41557	0.0107212	0.086	1.7548	0.1722	2.3726	26.3782	7.33027	0.0726329	0.00414265	this study
MD09-3257	303	32.9053	0.745396	0.153199	0.00220099	3.02216	0.00886196	2.81901	0.00404084	1.38666	0.0107814	0.0883	1.6127	0.1772	2.1824	28.6764	8.08393	0.0812233	0.00604048	this study
MD09-3257	303	32.9053	0.745396	0.153562	0.0010379	3.03351	0.0107858	2.91389	0.00404084	1.41084	0.0108956	0.0865	1.5766	0.1735	2.1336	29.3328	8.54727	0.0813723	0.00496257	this study
MD09-3257	304	33.0088	0.742662	0.147857	0.00147502	3.06643	0.00814316	2.88414	0.00404084	1.50556	0.00833408	0.08	1.6054	0.1608	2.1747	28.7784	8.30007	0.0740081	0.00471956	this study
MD09-3257	306	33.2158	0.728763	0.148599	0.00181598	2.98418	0.0102875	2.72801	0.00404084	1.44344	0.00893091	0.084	1.5963	0.1695	2.1666	28.8868	7.88035	0.0783003	0.00550999	this study
MD09-3257	307	33.3193	0.717826	0.145818	0.00285104	3.01046	0.00572695	2.69083	0.00404084	1.46875	0.00922022	0.081	1.628	0.1639	2.2116	28.299	7.61478	0.0741732	0.00648327	this study
MD09-3257	309	33.5262	0.687661	0.13015	0.00246129	2.6746	0.00859204	2.00983	0.00404084	1.25011	0.0156897	0.0781	1.5956	0.1589	2.1717	28.8186	5.79203	0.0731811	0.00569484	this study
MD09-3257	310	33.6297	0.667825	0.14395	0.00121185	2.94371	0.00347566	2.20596	0.00404084	1.5597	0.0076974	0.0825	1.7023	0.168	2.3192	26.9859	5.95296	0.0724685	0.00397626	this study
MD09-3257	311	33.7332	0.644898	0.167449	0.00232342	3.25335	0.00288919	2.69668	0.00404084	1.97844	0.0083218	0.0906	1.7135	0.1849	2.3367	26.7836	7.22271	0.0791725	0.00612672	this study
MD09-3257	311	33.7332	0.644898	0.166482	0.00243067	3.27422	0.00945128	2.72442	0.00404084	1.96557	0.0172545	0.0896	1.7287	0.1829	2.3573	26.5493	7.23314	0.0776344	0.00606308	this study
MD09-3257	312	33.8367	0.618921	0.165894	0.00123141	3.31434	0.00882343	2.90121	0.00404084	2.01035	0.00997316	0.0859	1.6932	0.1758	2.3112	27.0795	7.85634	0.076121	0.00502389	this study
MD09-3257	313	33.9402	0.589529	0.154732	0.000484127	3.05614	0.238203	2.53085	0.127523	1.52194	0.0191664	0.0904	1.7124	0.1854	2.3395	26.7509	6.77025	0.0792931	0.0246586	Burckel et al., 2015
MD09-3257	315	34.1472	0.515807	0.153417	0.000394626	3.04764	0.190095	2.27097	0.0553959	1.53255	0.0194447	0.0917	1.7902	0.1889	2.4506	25.5385	5.7997	0.0771293	0.0175446	Burckel et al., 2015
MD09-3257	317	34.3806	0.536032	0.140197	0.000486446	2.85909	0.190011	2.08268	0.0811184	1.40238	0.0196531	0.0837	1.7063	0.1732	2.3407	26.7381	5.5687	0.0740118	0.0176923	Burckel et al., 2015
MD09-3257	320	34.7792	0.728473	0.13369	0.000408213	2.90555	0.172059	2.29804	0.0838835	1.46014	0.0148389	0.0733	1.6595	0.1531	2.2849	27.3907	6.29448	0.0670253	0.0147477	Burckel et al., 2015
MD09-3257	323	35.1778	0.841568	0.13687	0.000398296	2.92778	0.211159	2.46031	0.123162	1.37518	0.0105318	0.0767	1.652	0.1615	2.2829	27.4151	6.74496	0.0707929	0.01978	Burckel et al., 2015
MD09-3257	325	35.4435	0.89457	0.16989	0.00041176	3.37631	0.240765	2.96041	0.152267	1.55071	0.0183089	0.1	1.8738	0.2118	2.5957	24.111	7.13784	0.0816222	0.0234429	Burckel et al., 2015
MD09-3257	327	35.7093	0.930301	0.164879	0.000396326	3.23927	0.177391	2.90601	0.0820566	1.51683	0.0285002	0.0964	1.7659	0.2053	2.4523	25.5212	7.41649	0.0837529	0.0182801	Burckel et al., 2015
MD09-3257	330	36.1079	0.955662	0.138387	0.000396157	2.94761	0.210446	2.43376	0.115436	1.36654	0.0154957	0.0787	1.6826	0.1689	2.3451	26.6874	6.49507	0.0720701	0.0196518	Burckel et al., 2015
MD09-3257	333	36.5065	0.950051	0.141521	0.000464099	2.73667	0.117051	1.76652	0.0380334	1.5336	0.0190584	0.0847	1.6422	0.1835	2.2973	27.2432	4.81257	0.0798885	0.0119188	Burckel et al., 2015
MD09-3257	335	36.7722	0.929282	0.143114	0.000351381	3.01791	0.17792	1.86058	0.053499	1.89031	0.0213794	0.0764	1.774	0.1663	2.4876	25.1583	4.68089	0.0668773	0.0141485	Burckel et al., 2015
MD09-3257	338	37.1708	0.869588	0.12965	0.000270081	2.65563	0.125012	1.78029	0.0405397	1.63421	0.0249194	0.07	1.5202	0.1537	2.1396	29.2506	5.20745	0.0718745	0.0124483	Burckel et al., 2015
MD09-3257	338	37.1708	0.869588	0.119534	0.000422597	2.64461	0.186566	1.74899	0.0610363	1.59489	0.0184943	0.0612	1.5326	0.1344	2.1571	29.0134	5.07442	0.0623351	0.0163874	Burckel et al., 2015
MD09-3257	340	37.4365	0.807202	0.136581	0.000358925	2.93918	0.182581	2.22788	0.0685124	1.72614	0.0223571	0.0699	1.6222	0.1543	2.2888	27.3441	6.09193	0.0674459	0.0162009	Burckel et al., 2015
MD09-3257	341	37.5694	0.770645	0.143169	0.000314425	2.91368	0.195384	2.28359	0.0830444	2.99408	0.0908208	0.0438	1.1558	0.0971	1.6327	38.3316	8.75337	0.0594967	0.0240591	Burckel et al., 2015
MD09-3257	342	37.7023	0.726899	0.140789	0.000342475	3.07551	0.205972	2.63455	0.109454	1.90033	0.0203858	0.0654	1.5637	0.1452	2.2117	28.2974	7.45508	0.065694	0.0190747	Burckel et al., 2015
MD09-3257	343	37.8351	0.682135	0.144769	0.000389906	2.97844	0.1736	2.73497	0.117069	1.74167	0.0376766	0.0723	1.4858	0.161	2.104	29.7459	8.13541	0.0765898	0.0196785	Burckel et al., 2015
MD09-3257	345	38.0434	0.618038	0.154557	0.00036042	3.13057	0.191357	2.83071	0.128473	1.73703	0.0204927	0.0812	1.6071	0.1816	2.2802	27.4476	7.76962	0.0797031	0.0209181	Burckel et al., 2015
MD09-3257	347	38.1942	0.637324	0.178632	0.000513482	3.44708	0.223352	3.18441	0.134364	2.12819	0.0729312	0.0916	1.6741	0.2056	2.3786	26.3119	8.37878	0.0865016	0.026063	Burckel et al., 2015
MD09-3257	347	38.1942	0.637324	0.158251	0.000590536	3.39101	0.193257	3.09455	0.129815	2.07249	0.0528522	0.0736	1.6666	0.1652	2.3679	26.4305	8.17906	0.0698023	0.017821	Burckel et al., 2015
MD09-3257	350	38.4204	0.655986	0.17599	0.000429623	3.4835	0.248742	4.05492	0.25129	2.01943	0.0359373	0.0826	1.456	0.1863	2.073	30.1905	12.242	0.0899673	0.613649	Burckel et al., 2015
MD09-3257	350	38.4204	0.655986	0.17628	0.00054874	3.5162	0.203492	4.03472	0.150229	2.02096	0.0221409	0.0833	1.4976	0.1878	2.1322	29.3523	11.8428	0.0881699	0.0288535	Burckel et al., 2015
MD09-3257	352	38.5712	0.664254	0.163253	0.000450516	3.15609	0.193466	3.89641	0.219252	2.09132	0.0458592	0.0699	1.1592	0.1581	1.6527	37.8676	14.7548	0.0957311	0.0636481	Burckel et al., 2015
MD09-3257	354	38.722	0.669018	0.188944	0.00058076	3.42673	0.207283	3.95266	0.205685	2.3167	0.0593702	0.0892	1.3343	0.2024	1.905	32.8533	12.9858	0.10631	0.0828295	Burckel et al., 2015
MD09-3257	354	38.722	0.669018	0.176681	0.000763359	3.4219	0.206485	3.84036	0.204554	2.29467	0.0395809	0.0786	1.374	0.1784	1.9616	31.9044	12.2524	0.0910295	0.0341405	Burckel et al., 2015
MD09-3257	360	39.1743	0.658917	0.155435	0.00259217	2.95639	0.0668159	3.88632	0.0589021	3.00454	0.0632709	0.0384	0.6478	0.0881	0.9287	67.39	26.19	0.0949467	0.0378637	this study*
MD09-3257	370	39.9283	0.555947	0.169182	0.000580613	2.93713	0.148298	3.99015	0.181674	2.0088	0.0984596	0.077	0.9372	0.1792	1.353	46.2558	18.4568	0.132541	0.181808	Burckel et al., 2015
MD09-3257	370	39.9283	0.555947	0.16258	0.00279205	2.85733	0.0670534	3.82921	0.0809275	1.86294	0.0414212	0.0744	0.9427	0.1733	1.3609	45.9872	17.6095	0.127428	0.0397462	this study
MD09-3257	372	40.1821	0.694851	0.160818	0.000367807	3.04426	0.206793	2.75253	0.126232	2.42173	0.111419	0.0699	1.3004	0.1636	1.8817	33.2596	9.1548	0.0869604	0.0327471	Burckel et al., 2015
MD09-3257	374	40.4702	0.846406	0.141493	0.000417228	2.81548	0.106295	2.20391	0.0549492	1.43124	0.0215323	0.082	1.5971	0.1932	2.3171	27.0104	5.95286	0.0833976	0.0119643	Burckel et al., 2015
MD09-3257	376	40.7583	0.957115	0.137662	0.000335521	2.76725	0.15825	1.93215	0.0508353	1.76299	0.0552989	0.072	1.5177	0.1705	2.2078	28.3475	5.47718	0.077262	0.0171572	Burckel et al., 2015
MD09-3257	378	41.0465	1.04899	0.130179	0.000276879	2.78837	0.149894	1.87419	0.0452666	1.32401	0.0109646	0.0767	1.7129	0.1828	2.4982	25.0515	4.69512	0.0731975	0.0134816	Burckel et al., 2015
MD09-3257	380	41.3346	1.12606	0.116887	0.000253227	2.47645	0.146784	1.78726	0.0668695	1.18481	0.00950481	0.0679	1.4781	0.1629	2.1615	28.9544	5.1749	0.0753911	0.0158561	Burckel et al., 2015
MD09-3257	382	41.6227	1.18875	0.136718	0.000323151	2.58214	0.118526	2.19314	0.0651559	1.30523	0.0173025	0.0806	1.4101	0.1945	2.0676	30.27	6.63863	0.0941011	0.0171807	Burckel et al., 2015
MD09-3257	382	41.6227	1.18875	0.136402	0.00251201	2.53243	0.0463424	2.34512	0.0279033	1.29342	0.0338402	0.0792	1.3161	0.191	1.9298	32.4304	7.60531	0.0990133	0.0110401	this study
MD09-3257	385	42.0549	1.26257	0.132671	0.00035718	2.7568	0.150048	2.56316	0.109769	1.41016	0.0120477	0.0702	1.4283	0.1709	2.1026	29.765	7.62925	0.081317	0.0186672	Burckel et al., 2015
MD09-3257	387	42.343	1.30032	0.155726	0.000399039	3.23712	0.238654	3.02608	0.142076	1.59164	0.024814	0.0839	1.6952	0.2056	2.5022	25.0119	7.56881	0.0822154	0.0262001	Burckel et al., 2015
MD09-3257	390	42.7752	1.33845	0.147943	0.00041392	3.19206	0.276205	2.68486	0.0833905	1.47354	0.0128617	0.0825	1.8011	0.2041	2.6691	23.4481	6.29548	0.0764967	0.0267948	Burckel et al., 2015
GeoB3910	18	5.01	0.551	0.197	0.002	3.713	0.016	0.997	0.007	1.355	0.003	0.170161	3.19025	0.18919	3.34024	18.0693	1.81148	0.0566396	0.00175522	this study
GeoB3910	165	21.556	0.587	0.217	0.004	3.909	0.054	2.27	0.012	1.25	0.001	0.162861	2.79591	0.256977	3.40702	17.7151	4.12482	0.0754258	0.00659918	this study
* a Pa/Th value of 0.058 ± 0.014 was measured by Burckel et al. (2015) at 360 cm, that we discarded as an outlier with respect to the replicate measured at 360 cm and surrounding values

## Sheet: Opal
Waelbroeck et al., Climate of the Past
Table S2. MD09-3257 opal measurements
Depth, cm	Age, ka	1 σ	Opal MD09-3257, % weight	1 σ	Opal flux 3257 (g/cm^2 ky)	1 σ	Reference
84	10.9038	0.279125	0.836244	0.209061	0.0208064	0.0052016	this study
92	11.3495	0.389871	0.91874	0.229685	0.0361979	0.00904948	this study
100	11.7951	0.395066	1.37507	0.343768	0.0438919	0.010973	this study
108	12.2407	0.307101	0.58449	0.146122	0.0212053	0.00530132	this study
114	12.9756	0.608139	1.44803	0.362007	0.0308681	0.00771703	this study
126	14.4887	0.408417	1.29946	0.324865	0.0331264	0.0082816	this study
132	14.9574	0.43156	1.07152	0.26788	0.0272453	0.00681132	this study
140	15.5621	0.291282	1.90807	0.477017	0.0593788	0.0148447	this study
168	17.2912	0.530713	0.585584	0.146396	0.0298487	0.00746217	this study
176	17.8185	0.49712	0.520207	0.130052	0.0194579	0.00486447	this study
192	19.3232	0.813066	0.889156	0.222289	0.0186899	0.00467247	this study
196	19.9398	0.976934	0.745413	0.186353	0.0144285	0.00360713	this study
245	25.554	0.261	0.961581	0.0568647	0.0170454	0.00100801	Burckel et al., 2015
247	26.1375	0.389598	1.15788	0.0595655	0.0243823	0.00125432	Burckel et al., 2015
250	26.6646	0.613578	0.819988	0.16816	0.0154635	0.00317121	Burckel et al., 2015
252	26.9903	0.683677	0.811754	0.122335	0.0159519	0.00240402	Burckel et al., 2015
255	27.4787	0.697291	1.1033	0.0114579	0.0251782	0.000261478	Burckel et al., 2015
257	27.8044	0.646867	0.63003	0.0563959	0.0149018	0.0013339	Burckel et al., 2015
341	37.5694	0.770645	0.855319	0.259369	0.0328754	0.00996922	Burckel et al., 2015
343	37.8351	0.682135	0.6679	0.0981133	0.0198678	0.00291854	Burckel et al., 2015
347	38.1942	0.637324	0.61	0.13	0.0160774	0.00342633	Burckel et al., 2015
350	38.4204	0.655986	0.92	0.43	0.0273332	0.0127753	Burckel et al., 2015
352	38.5712	0.664254	0.55	0.02	0.0208146	0.000756896	Burckel et al., 2015
354	38.722	0.669018	0.94	0.02	0.0304333	0.000647518	Burckel et al., 2015
360	39.1743	0.658917	0.345056	0.086264	0.0232533	0.00581333	this study
370	39.9283	0.555947	0.854463	0.213616	0.0392944	0.0098236	this study
